# Supplementary material for: Integrated Profiling of Fatty Acids, Sterols and Phenolic Compounds in Tree and Herbaceous Peony Seed Oils: Marker Screening for New Resources of Vegetable Oil
Source: PubMed Central journal article supplement (PMC7353516; doi:10.3390/foods9060770), 2020-06-11
Supplement: foods-09-00770-s001.pdf [file foods-09-00770-s001.pdf]

# Integrated profiling of fatty acids, sterols and phenolic compounds in tree and herbaceous peony seed oils: Marker screening for new resources of vegetable oil

Xiaoqin Wang <sup>1,2,\*</sup>, Chunhuan Li <sup>1,2,3</sup>, María del Mar Contreras <sup>4\*</sup>, Vito Verardo <sup>5,6</sup>, Ana María Gómez-Caravaca <sup>7</sup>, Chen Xing <sup>1,2</sup>

<sup>1</sup> College of Chemical Engineering, Huaqiao University, Xiamen, Fujian 361021, China; xiaoqin77@foxmail.com (X.W.); 1192535487@qq.com (C.L.); xingchen94621@qq.com (C.X.)

<sup>2</sup> Institute of Oil and Natural Product, Huaqiao University, Xiamen, Fujian 361021, China

<sup>3</sup> Shandong Institute for Food and Drug Control, Jinan, Shandong 250101, China

<sup>4</sup> Department of Chemical, Environmental and Materials Engineering, Universidad de Jaén, Campus Las Lagunillas, Jaén 23071, Spain; mcgamez@ujaen.es

<sup>5</sup> Department of Nutrition and Food Science, University of Granada, Campus of Cartuja, 18071, Granada, Spain; vitoverardo@ugr.es

<sup>6</sup> Institute of Nutrition and Food Technology 'José Mataix', Biomedical Research Centre, University of Granada, Avenida del Conocimiento s/n, E-18071 Granada, Spain

<sup>7</sup> Department of Analytical Chemistry, University of Granada, c/Fuentenueva s/n, E-18071 Granada, Spain; anagomez@ugr.es

\* Correspondence: mcgamez@ujaen.es (mar.contreras.gamez@gmail.com or mmcontreras@ugr.es); Tel. +34 953 21 27 99 (M.d.M.C); xiaoqin77@foxmail.com; Tel.: 86-0592-6166087 (X.W.)

## Supplementary information

**Table S1.** Oil content and relative fatty acid composition (%) of ten *Paeonia* seed oil samples <sup>1</sup>.

| Cultivar/Species |                                 | <i>P. ostii</i>                 |                                 |                                 |                                 |                                 |                                 |                                 | <i>P. rockii</i> TuoPanXianBao LianTai |                                 |                                 |                                 |
|------------------|---------------------------------|---------------------------------|---------------------------------|---------------------------------|---------------------------------|---------------------------------|---------------------------------|---------------------------------|----------------------------------------|---------------------------------|---------------------------------|---------------------------------|
| Region           | SXWN                            | SXSL                            | SDHZ                            | HNLY                            | AHTL                            | AHBZ                            | JSSY                            | HBWH                            | GSDX                                   | GSLZ                            | SDHZ                            | SDHZ                            |
| Oil yield (%)    | 33.64±<br>0.19 <sup>a</sup>     | 32.96±<br>0.26 <sup>b</sup>     | 30.65±<br>0.10 <sup>e</sup>     | 31.83±<br>0.10 <sup>c</sup>     | 34.00±<br>0.26 <sup>a</sup>     | 30.67±<br>0.32 <sup>e</sup>     | 27.70±<br>0.58 <sup>g</sup>     | 31.06±<br>0.49 <sup>de</sup>    | 31.70±<br>0.45 <sup>cd</sup>           | 29.39±<br>0.53 <sup>f</sup>     | 32.17±<br>0.16 <sup>c</sup>     | 26.86±<br>0.12 <sup>h</sup>     |
| C14:0            | 0.0554±<br>0.0001 <sup>f</sup>  | 0.0613±<br>0.0001 <sup>a</sup>  | 0.0547±<br>0.0001 <sup>g</sup>  | 0.0453±<br>0.0001 <sup>k</sup>  | 0.0549±<br>0.0002 <sup>g</sup>  | 0.0528±<br>0.0001 <sup>h</sup>  | 0.0602±<br>0.0001 <sup>c</sup>  | 0.0602±<br>0.0001 <sup>c</sup>  | 0.0606±<br>0.0001 <sup>b</sup>         | 0.0568±<br>0.0001 <sup>e</sup>  | 0.0577±<br>0.0001 <sup>d</sup>  | 0.0479±<br>0.0002 <sup>j</sup>  |
| C15:0            | 0.0353±<br>0.0001 <sup>b</sup>  | 0.0339±<br>0.0001 <sup>d</sup>  | 0.0332±<br>0.0001 <sup>e</sup>  | 0.0338±<br>0.0001 <sup>d</sup>  | 0.0345±<br>0.0001 <sup>c</sup>  | 0.0335±<br>0.0003 <sup>e</sup>  | 0.0309±<br>0.0003 <sup>f</sup>  | 0.0307±<br>0.0002 <sup>f</sup>  | 0.0361±<br>0.0001 <sup>a</sup>         | 0.0256±<br>0.0001 <sup>h</sup>  | 0.0302±<br>0.0002 <sup>g</sup>  | 0.0241±<br>0.0001 <sup>j</sup>  |
| C16:0            | 5.7978±<br>0.0029 <sup>c</sup>  | 5.8844±<br>0.0026 <sup>a</sup>  | 5.5320±<br>0.0049 <sup>h</sup>  | 5.3379±<br>0.0031 <sup>j</sup>  | 5.7301±<br>0.0011 <sup>d</sup>  | 5.5478±<br>0.0047 <sup>g</sup>  | 5.6982±<br>0.0024 <sup>e</sup>  | 5.6905±<br>0.0011 <sup>f</sup>  | 5.8195±<br>0.0007 <sup>b</sup>         | 4.9419±<br>0.0010 <sup>k</sup>  | 5.4958±<br>0.0019 <sup>i</sup>  | 3.8477±<br>0.0030 <sup>l</sup>  |
| C16:1            | 0.1001±<br>0.0004 <sup>d</sup>  | 0.0922±<br>0.0002 <sup>i</sup>  | 0.0968±<br>0.0002 <sup>f</sup>  | 0.0896±<br>0.0003 <sup>j</sup>  | 0.0954±<br>0.0001 <sup>g</sup>  | 0.0934±<br>0.0010 <sup>h</sup>  | 0.1041±<br>0.0004 <sup>b</sup>  | 0.1038±<br>0.0005 <sup>b</sup>  | 0.1028±<br>0.0004 <sup>c</sup>         | 0.1049±<br>0.0001 <sup>a</sup>  | 0.0984±<br>0.0003 <sup>e</sup>  | 0.0660±<br>0.0001 <sup>k</sup>  |
| C17:0            | 0.1313±<br>0.0005 <sup>b</sup>  | 0.1142±<br>0.0002 <sup>d</sup>  | 0.1113±<br>0.0003 <sup>f</sup>  | 0.1112±<br>0.0004 <sup>f</sup>  | 0.1121±<br>0.0001 <sup>e</sup>  | 0.1209±<br>0.0003 <sup>c</sup>  | 0.1002±<br>0.0006 <sup>h</sup>  | 0.0997±<br>0.0009 <sup>h</sup>  | 0.1320±<br>0.0006 <sup>b</sup>         | 0.1378±<br>0.0001 <sup>a</sup>  | 0.1012±<br>0.0005 <sup>g</sup>  | 0.0696±<br>0.0001 <sup>i</sup>  |
| C17:1            | 0.0929±<br>0.0001 <sup>d</sup>  | 0.0705±<br>0.0005 <sup>j</sup>  | 0.0830±<br>0.0002 <sup>f</sup>  | 0.0819±<br>0.0003 <sup>g</sup>  | 0.0793±<br>0.0001 <sup>i</sup>  | 0.0909±<br>0.0007 <sup>e</sup>  | 0.0809±<br>0.0007 <sup>h</sup>  | 0.0806±<br>0.0005 <sup>h</sup>  | 0.0971±<br>0.0005 <sup>c</sup>         | 0.1333±<br>0.0001 <sup>b</sup>  | 0.0790±<br>0.0001 <sup>i</sup>  | 0.1388±<br>0.0006 <sup>a</sup>  |
| C18:0            | 1.9725±<br>0.0016 <sup>b</sup>  | 2.2607±<br>0.0014 <sup>a</sup>  | 1.7420±<br>0.0009 <sup>i</sup>  | 1.7767±<br>0.0011 <sup>g</sup>  | 1.8121±<br>0.0024 <sup>f</sup>  | 1.7507±<br>0.0005 <sup>h</sup>  | 1.8610±<br>0.0009 <sup>d</sup>  | 1.8511±<br>0.0020 <sup>e</sup>  | 1.8695±<br>0.0009 <sup>c</sup>         | 1.6481±<br>0.0012 <sup>j</sup>  | 1.8716±<br>0.0004 <sup>c</sup>  | 0.8142±<br>0.0012 <sup>k</sup>  |
| C18:1n9          | 21.7568±<br>0.0055 <sup>b</sup> | 21.4387±<br>0.0005 <sup>i</sup> | 21.8905±<br>0.0139 <sup>g</sup> | 20.6338±<br>0.0085 <sup>l</sup> | 22.0926±<br>0.0061 <sup>f</sup> | 21.0147±<br>0.0069 <sup>k</sup> | 23.8147±<br>0.0031 <sup>d</sup> | 23.7933±<br>0.0016 <sup>e</sup> | 21.3418±<br>0.0044 <sup>j</sup>        | 26.7798±<br>0.0011 <sup>b</sup> | 23.8279±<br>0.0055 <sup>c</sup> | 31.3515±<br>0.0101 <sup>a</sup> |
| C18:1n11         | 0.3355±<br>0.0018 <sup>d</sup>  | 0.3280±<br>0.0012 <sup>ef</sup> | 0.3478±<br>0.0028 <sup>bc</sup> | 0.3247±<br>0.0034 <sup>f</sup>  | 0.3313±<br>0.0027 <sup>de</sup> | 0.3170±<br>0.0069 <sup>g</sup>  | 0.3523±<br>0.0006 <sup>b</sup>  | 0.3522±<br>0.0023 <sup>b</sup>  | 0.3265±<br>0.0022 <sup>ef</sup>        | 0.2994±<br>0.0019 <sup>h</sup>  | 0.3458±<br>0.0015 <sup>c</sup>  | 0.4127±<br>0.0069 <sup>a</sup>  |
| C18:2n6          | 24.6044±<br>0.0029 <sup>h</sup> | 23.9758±<br>0.0011 <sup>i</sup> | 25.7201±<br>0.0029 <sup>e</sup> | 27.7490±<br>0.0095 <sup>c</sup> | 29.9448±<br>0.0029 <sup>b</sup> | 27.6882±<br>0.0046 <sup>d</sup> | 25.0237±<br>0.0008 <sup>g</sup> | 25.0396±<br>0.0191 <sup>f</sup> | 23.2454±<br>0.0139 <sup>k</sup>        | 16.9078±<br>0.0025 <sup>l</sup> | 23.6166±<br>0.0014 <sup>j</sup> | 30.7427±<br>0.0054 <sup>a</sup> |

|                 |                      |                     |                     |                     |                     |                      |                      |                     |                     |                     |                      |                     |
|-----------------|----------------------|---------------------|---------------------|---------------------|---------------------|----------------------|----------------------|---------------------|---------------------|---------------------|----------------------|---------------------|
| $\alpha$ -C18:3 | 0.2089 $\pm$         | 0.2192 $\pm$        | 0.2261 $\pm$        | 0.2191 $\pm$        | 0.1939 $\pm$        | 0.2115 $\pm$         | 0.2077 $\pm$         | 0.2047 $\pm$        | 0.2147 $\pm$        | 0.1930 $\pm$        | 0.2077 $\pm$         | 0.1617 $\pm$        |
| n3              | 0.0024 <sup>de</sup> | 0.0014 <sup>b</sup> | 0.0048 <sup>a</sup> | 0.0006 <sup>b</sup> | 0.0021 <sup>g</sup> | 0.0002 <sup>cd</sup> | 0.0009 <sup>ef</sup> | 0.0014 <sup>f</sup> | 0.0014 <sup>c</sup> | 0.0007 <sup>g</sup> | 0.0016 <sup>ef</sup> | 0.0009 <sup>h</sup> |

<sup>1</sup> Values are means  $\pm$  standard deviations, n=3. Different superscript letters within the same row indicate significant differences (one-way ANOVA and Duncan test,  $p \leq 0.05$ ).

SFA, saturated fatty acids; MUFA, monounsaturated fatty acids; PUFA, polyunsaturated fatty acids; UFA, unsaturated fatty acids.
